# Supplementary material for: Solar photocatalytic ozonation of emerging contaminants detected in municipal wastewater treatment plant effluents by magnetic MWCNTs/TiO2 nanocomposites
Source: Royal Society of Chemistry journal article supplement (doi:10.1039/c5ra18752d), 2015-01-01
Supplement: c5ra18752d1.pdf [file c5ra18752d1.pdf]

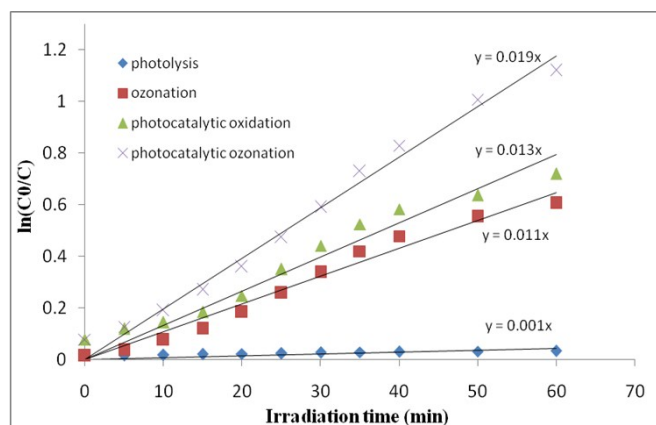

ESI Fig. 1. Apparent first-order linear transform  $\ln(C_0/C)$  vs.  $t$  of degradation kinetic plots for different treatments.

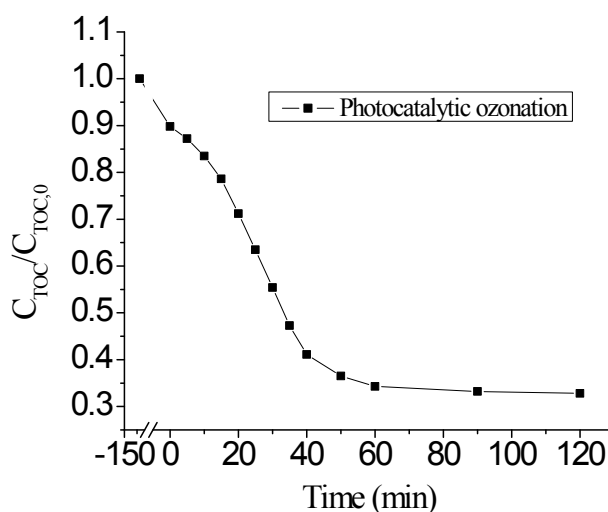

ESI Fig. 2. Time evolution of the concentration of TOC for treatment of photocatalytic ozonation.
